# Supplementary material
Source: Springer Nature journal article supplement (https://www.springermedizin.de/resource/supplementary/12967_2013_1537_MOESM4_ESM.pdf/9574278)

**A**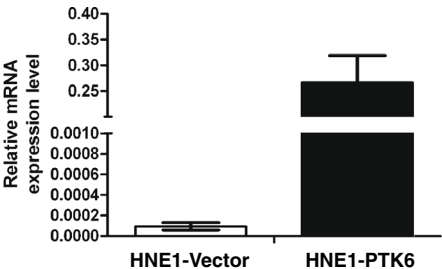**B**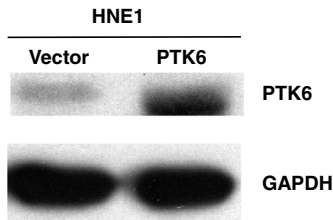**C**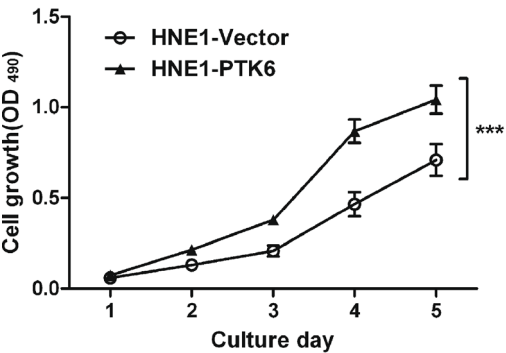**D**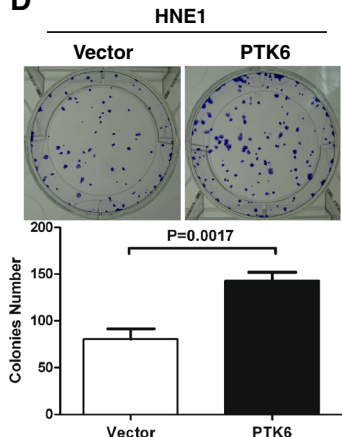

Supplement: MOESM4 [file 9574278]
